# Supplementary material
Source: publisher figshare collection journal article supplement (https://acs.figshare.com/ndownloader/files/4082140)
Supplement: Supplementary file 1 [file 4082140]

## **Supporting Information**

### **Influence of Morphology on the Optical Properties of Self-Grown Nanowire Arrays**

**Liqiang Li<sup>1</sup>, Zhufeng Liu<sup>1</sup>, Ming Li<sup>1</sup>, Lan Hong<sup>1</sup>, Hui Shen<sup>1</sup>, Chaolun Liang<sup>2</sup>,  
Hong Huang<sup>2</sup>, Dan Jiang<sup>2</sup>, and Shan Ren<sup>1\*</sup>**

<sup>1</sup>State Key Laboratory of Optoelectronic Materials and Technologies, The Key Laboratory of  
Low-carbon Chemistry & Energy Conservation of Guangdong Province, The Center for  
Nanotechnology Research, School of Physics Science and Engineering, Sun Yat-sen  
(Zhongshan) University, Guangzhou 510275, P. R. China

<sup>2</sup>Instrumental Analysis & Research Center, Sun Yat-sen (Zhongshan) University, Guangzhou  
510275, P. R. China

E-mail: stsr@mail.sysu.edu.cn. Tel: +86(20)84113887.

## **Experimental details**

### **(1) The synthesis of Cu<sub>2</sub>S nanowire arrays**

Solid-gas reaction was used to prepare Cu<sub>2</sub>S nanowire arrays, Copper foil (99.9% purity)  
was carefully polished with number 0-6 abrasive paper, and then washed with

---

\* Author to whom any correspondence should be addressed.

deionized water. The foil was cleaned sequentially in an ultrasonic bath containing 3% sulfuric acid, then absolute ethanol, and finally deionized water three times. The solid–gas reaction was performed in an airtight ceramic pipe (Figure S1). Pure  $O_2$  with a flow of 800 sccm was introduced into the pipe for 5 min, and then switched to the mixed gas of  $H_2S$  (3000 sccm) and  $O_2$  (240 sccm) for about 3 min, at last, the pipe was sealed and kept at a fixed temperature of 18, 20, 25, 28 or 30 °C for 15 h. By the way, the excess  $H_2S$  was absorbed by NaOH solution, the  $O_2$  was first flow through the water before mixing with  $H_2S$  to increase the humidity of the reaction. The area of each sample was about 15×25 mm. The temperature was controlled by thermostatic water bath.

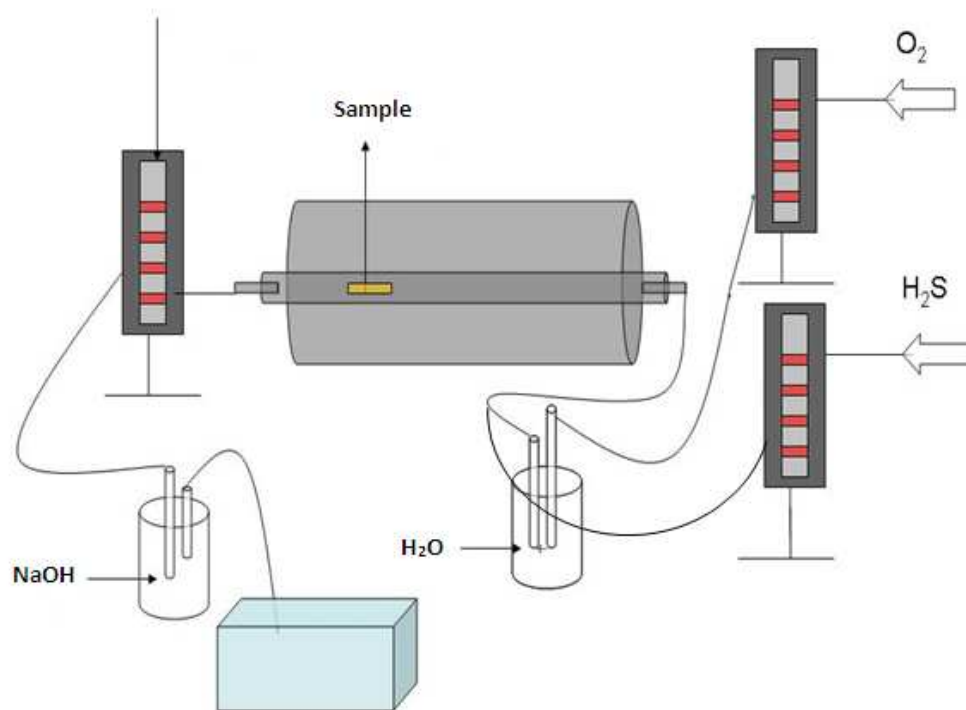

**Figure S1.** The reaction device that was used for the growth of  $Cu_2S$  nanowires.

## **(2) The characterization of $Cu_2S$ nanowire arrays**

Scanning electron microscopy (SEM) and X-ray diffraction (XRD) was used to observe the morphology and make sure the phase of  $Cu_2S$  nanowire arrays; Transmission electron

microscopy (TEM) was performed on an electron microscope (JEOL JEM-2010HR) equipped with an energy-dispersive X-ray spectrometer (EDS, Oxford, UK) to characterize the growth direction and the component elements of the nanowire; X-ray photoelectron spectroscopy (XPS) and Raman spectrum were used to analyze the surface component of the nanowire; Photoluminescence (PL) spectra were measured to characterize the band gap of the nanowire; Diffused reflectance spectra (DRS) were used to measure the light absorption properties of Cu<sub>2</sub>S nanowires of different morphologies.

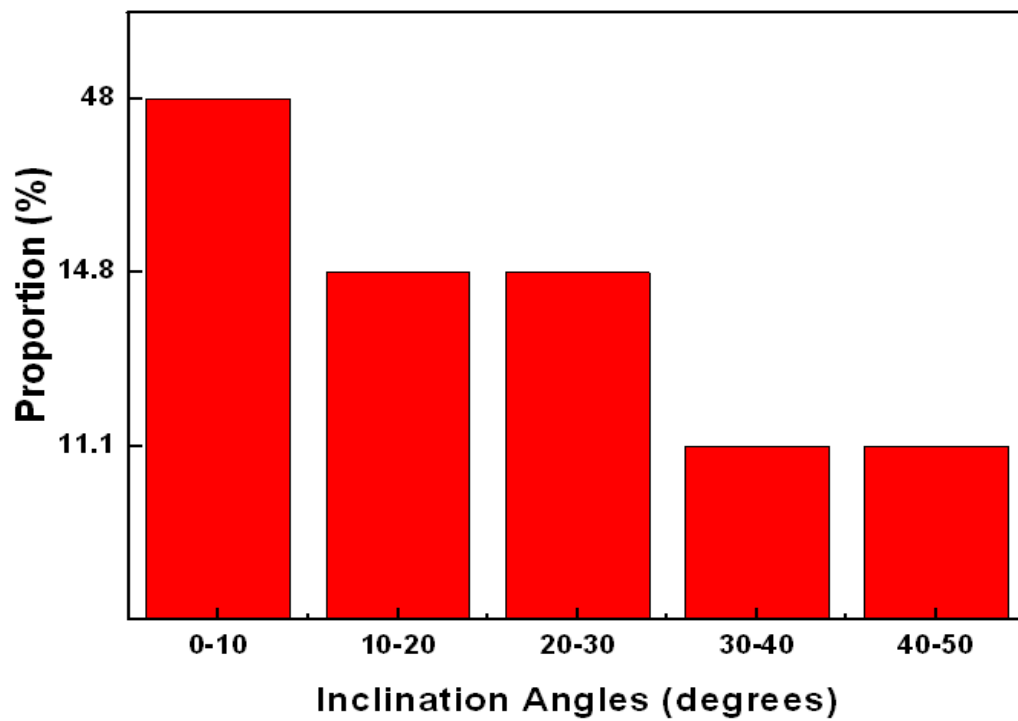

**Figure S2.** The proportion of Cu<sub>2</sub>S nanowire with different inclination angles.

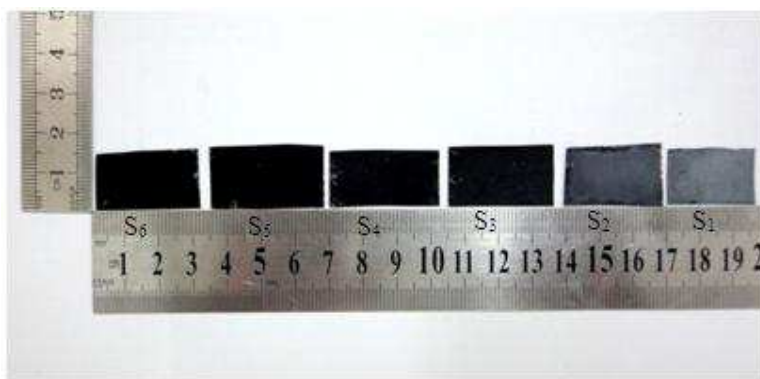

**Figure S3.** Digital camera images, S<sub>1</sub>-S<sub>6</sub> Corresponding to the Cu<sub>2</sub>S nanowire arrays demonstrated in figure 1 (S<sub>1</sub>)- (S<sub>6</sub>). The minimum scale of the ruler is mm.

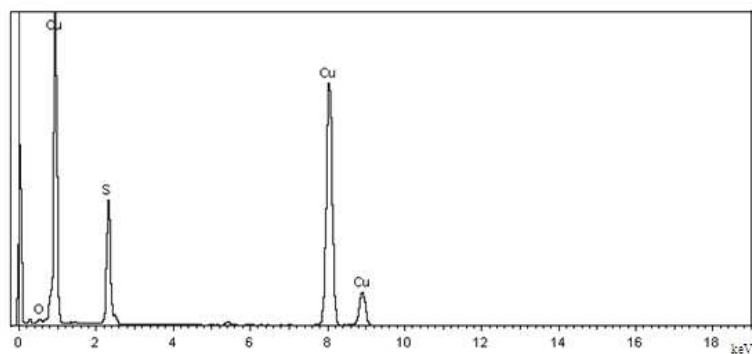

**Figure S4.** EDS of  $\text{Cu}_2\text{S}$  nanowire arrays, which shows the composition of the nanowire is Cu, S and O, indicating there is a certain amount of  $\text{O}^{2-}$  in the nanowire and part of  $\text{O}^{2-}$  will combined with  $\text{Cu}^{x+}$  and formed  $\text{Cu}_x\text{O}$  ( $x=1, 2$ ).

**Table S1.** The content ratio of the ions (O ion, Cu ion and S ion) with different valences. (a) Corresponding to the Cu<sub>2</sub>S nanowire arrays prepared at 18°C with a reaction time of 15 h, (b) corresponding to the Cu<sub>2</sub>S film prepared at 18°C with a reaction time of 2 h. following the Cu<sub>2</sub>S film becomes Cu<sub>2</sub>S nanowire arrays, the relative amount of both the Cu<sub>x</sub>O and Cu<sub>2</sub>S become bigger.

| Samples corresponding<br>to figure 5 | Peak area of<br>O <sup>2-</sup> :peak area of O | Peak area of Cu <sup>+</sup> /Cu:<br>peak area of Cu <sup>2+</sup> | Peak area of<br>S <sup>2-</sup> :peak area of S |
|--------------------------------------|-------------------------------------------------|--------------------------------------------------------------------|-------------------------------------------------|
| a                                    | 0.281                                           | 0.579                                                              | 1.56                                            |
| b                                    | 0.176                                           | 0.457                                                              | 1.41                                            |
